# Supplementary material
Source: Springer Nature journal article supplement (https://www.springermedizin.de/resource/supplementary/12950_2009_158_MOESM4_ESM.pdf/9558084)

● Mean  
5%-95% C.I.  
1%-99% C.I.

**A**

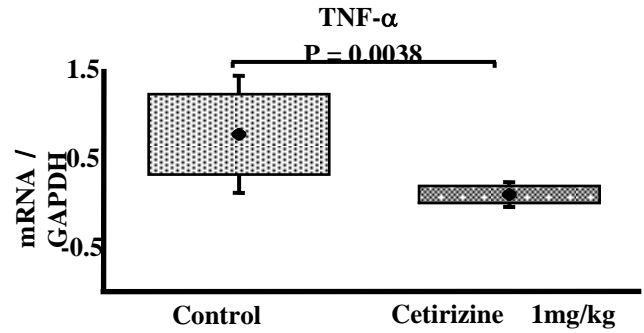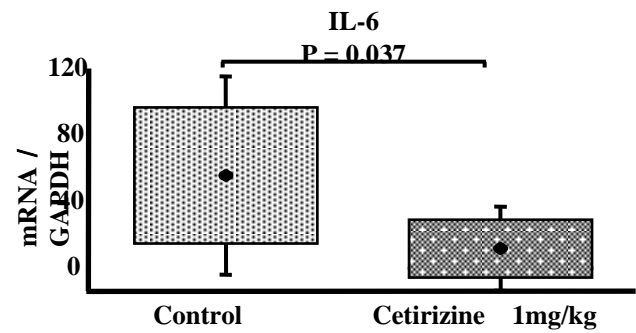

**B**

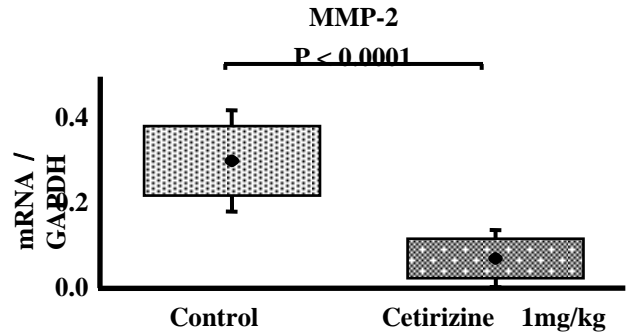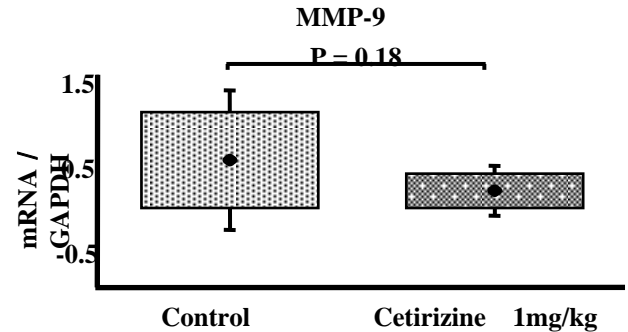

Supplement: MOESM4 [file 9558084]
